# Supplementary material for: A hydrophobic imidazolium cationic framework for selective adsorption of TcO4−/ReO4− from aqueous solutions
Source: Royal Society of Chemistry journal article supplement (doi:10.1039/d2ma00220e), 2022-01-01
Supplement: d2ma00220e1.pdf [file d2ma00220e1.pdf]

## Electronic Supporting information

For

### **Hydrophobic Imidazolium Cationic Framework for Selective Adsorption of $\text{TcO}_4^-/\text{ReO}_4^-$ from Aqueous Solutions**

Xupeng Zhi<sup>a</sup>, Xiaomin Li<sup>a</sup>, Fangfei Dong<sup>a</sup>, Yiwei Huang<sup>a</sup>, Suliang Yang<sup>b\*</sup>, Taihong Yan<sup>b\*</sup>, Yinglin Shen<sup>a\*</sup>

*a. School of Nuclear Science and Technology, Lanzhou university, 730099, Lanzhou, China*

*b. Radiochemistry Department, China Institute of Atomic Energy, Beijing 102413, China*

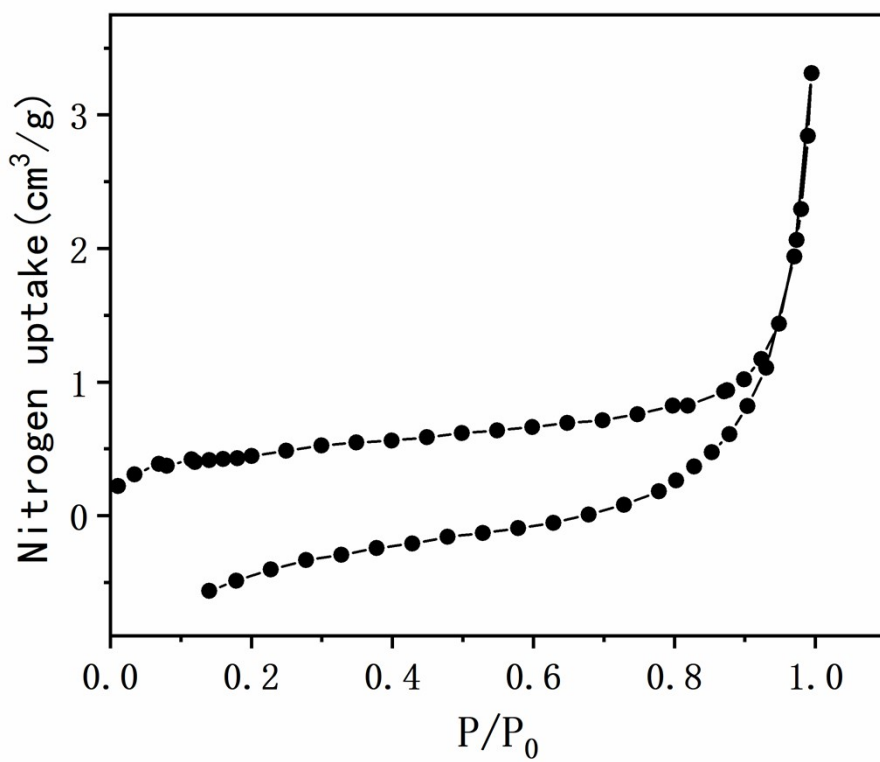

Fig. S 1 Nitrogen adsorption and desorption at 77 k.

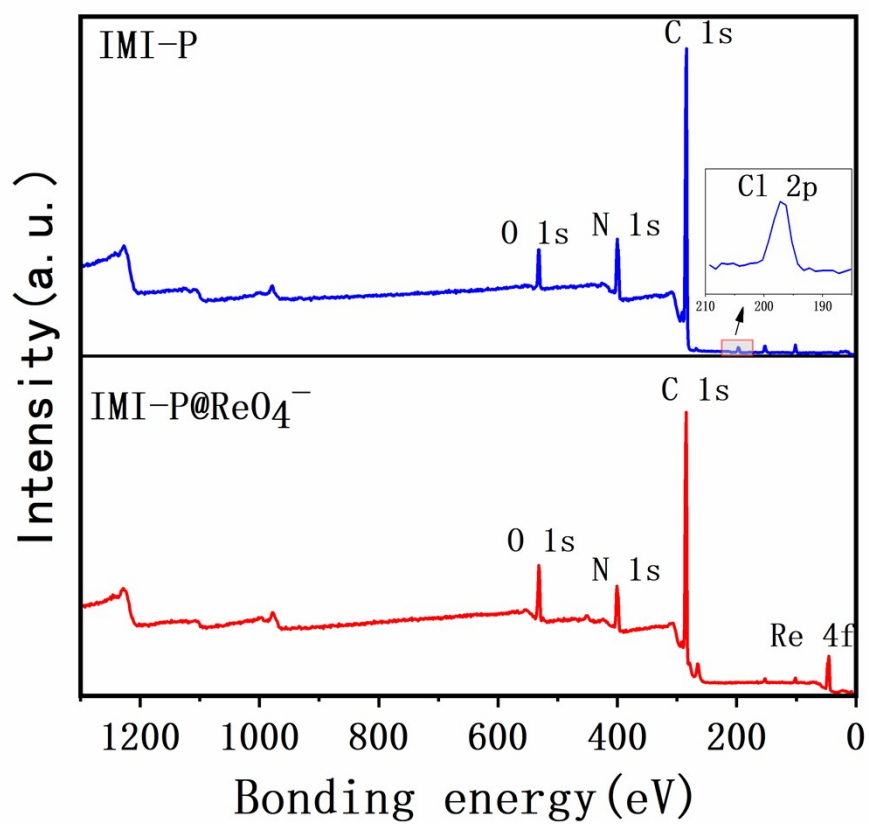

Fig. S 2 Full spectra of IMI-P and IMI-P@ReO<sub>4</sub><sup>-</sup>.
