# Supplementary figures and images for: A hydrophobic imidazolium cationic framework for selective adsorption of TcO4−/ReO4− from aqueous solutions
Source: Royal Society of Chemistry journal article supplement (doi:10.1039/d2ma00220e), 2022-01-01

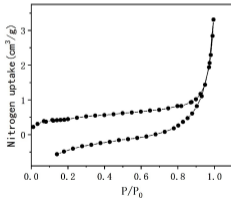

Supplement: d2ma00220e2.pdf [file d2ma00220e2.pdf]

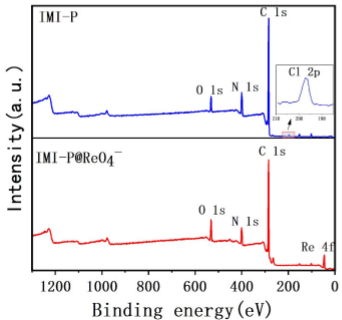

Supplement: d2ma00220e3.pdf [file d2ma00220e3.pdf]
